# Supplementary material for: T Cells Primed by Live Mycobacteria Versus a Tuberculosis Subunit Vaccine Exhibit Distinct Functional Properties
Source: PubMed Central journal article supplement — eBioMedicine. 2017 Dec 7;27:27–39. doi: 10.1016/j.ebiom.2017.12.004 (PMC5828549; doi:10.1016/j.ebiom.2017.12.004), 2017-12-07
Supplement: mmc1.pdf [file mmc1.pdf]

## 1 Supplementary Figure legends

2 **Supplementary Figure 1.** *Contraction and differentiation state of ESAT-6<sub>4-17</sub> specific lung CD4 T*  
3 *cells prior to, during and long-term after 12 weeks treatment with Isoniacid/Rifabutin (INH/RIF) of*  
4 *C57BL/6 mice infected with M. tuberculosis (Mtb) for 6 weeks.*

5 **A)** CFU levels in Mtb infected (~100 CFU/lung) C57BL/6 mice prior to, under and after a 12-week  
6 INH/RIF treatment period. Total lung CFU was determined by serial plating. Data show mean  $\pm$  s.d.  
7 of 4-16 mice/time-point

8 **B)** The number of ESAT-6<sub>4-17</sub>-specific CD4 T cells in perfused lungs was determined by Tetramer  
9 pulldown in Mtb infected and treated mice at week 0, 6, 12 and 40 after start of treatment.  
10 Symbols, mean  $\pm$  s.d. of 3-4 mice per time point. The experiment was repeated twice at week 0 &  
11 6 and once at week 12 & 40.

12 **C)** Representative flow cytometry plots depicting KLRG1, PD-1 and ICOS expression by ESAT-6  
13 tetramer-binding CD4 T cells after magnetic enrichment in perfused lungs of Mtb infected and  
14 treated mice at week 0 to 40 after start of INH/RIF treatment.

15

16 **Supplementary Figure 2.** *Memory cells shortly after a cleared Mycobacterium tuberculosis*  
17 *infection show a higher degree of differentiation than memory cells 3-6 weeks post H56/CAF01*  
18 *immunization.*

19 **A)** Quantitative data showing the expression of KLRG1 vs PD-1, KLRG1 vs ICOS and CXCR3 vs  
20 CX3CR1 on ESAT-6 tetramer-specific CD4 T cells primed by a cleared Mtb infection and after  
21 three bi-weekly H56/CAF01 vaccinations. Mtb memory show expression on ESAT-6<sub>4-17</sub>-specific  
22 cells after tetramer pulldown on perfused lungs following clearance of an Mtb infection by a 12  
23 weeks Isoniacid/Rifabutin treatment schedule. Tetramer pulldown was carried out 0-3 weeks post  
24 end of treatment (EoT). H56 memory show the expression on ESAT-6 tetramer binding spleen

25 cells 3-6 weeks after last (3<sup>rd</sup>) immunization. Bars show mean percentages of ESAT-6 tetramer +ve  
26 CD4 T cells  $\pm$  s.d. expressing each combination of markers. Values from individual mice are shown  
27 by black circles.

28 Two-way ANOVA with Sidak's multiple comparison test. \*\* P < 0.01, \*\*\* P < 0.001, \*\*\*\* P < 0.0001.

29

30 **Supplementary Figure 3.** *Mycobacterium bovis Bacillus Calmette-Guérin (BCG) drives CD4*  
31 *memory responses of high differentiation reminiscent of the memory responses after a cleared*  
32 *Mycobacterium tuberculosis infection.*

33 A), C) & E). CB6F1 (C57BL/6 x Balb/C) mice were infected with *M. tuberculosis* by the aerosol  
34 route for 6 weeks and then subjected to 6 weeks treatment with Isoniacid/Rifabutin (INH/RIF) to  
35 clear the infection. Ag-specific responses were analyzed after the 6 week treatment period. B), D)  
36 & F) CB6F1 (C57BL/6 x Balb/C) mice were immunized once with BCG by s.c. route and Ag-  
37 specific responses analyzed 8 weeks post immunization..

38 TB10.4-specific CD4 T cell responses were analyzed by MHC-II tetramer-based magnetic  
39 enrichment using PE-conjugated I-A<sup>d</sup>:TB10.4<sub>70-84</sub> tetramer.

40 **A)** Representative flow plots showing tetramer pull-down in spleen (left) and perfused lung (right) in  
41 Mtb infected and cleared (6 week chemo) CB6F1 mice using MHC-II I-A<sup>d</sup>:TB10.4<sub>70-84</sub> or irrelevant  
42 control tetramer I-A<sup>d</sup>:hCLIP.

43 **B)** Representative flow plots showing tetramer pull-down in spleen of BCG immunized CB6F1 mice  
44 using MHC-II I-A<sup>d</sup>:TB10.4<sub>70-84</sub> or irrelevant control tetramer I-A<sup>d</sup>:hCLIP..

45 **C)** Quantitative data showing the expression of KLRG1 and PD-1 among TB10.4<sub>70-84</sub>-specific CD4  
46 T cells in the spleen (left) and perfused lungs (right) of Mtb infected and treated CB6F1 mice. Mean  
47  $\pm$  s.d. with individual data shown in black circles. TB10.4-specific responses in both spleen and  
48 lung (~55%) are dominated by the KLRG1+PD-1- subset.(Spleen ~40%; Lung ~55%).

49

50 **D)** Quantitative data showing the expression of KLRG1 and PD-1 among TB10.4<sub>70-84</sub>-specific CD4  
51 T cells in the spleen of BCG-immunized CB6F1 mice. Mean  $\pm$  s.d. with individual data shown in  
52 black circles. Similar to Mtb infected and treated mice, TB10.4-specific responses in BCG-  
53 immunized mice are dominated by the KLRG1+PD-1- subset.

54

55 **E)** Representative flow plots showing KLRG1 vs PD-1 expression among TB10.4<sub>70-84</sub>-tetramer  
56 binding CD4 T cells in the spleen (left) and perfused lung (right) of Mtb infected and cleared CB6F1  
57 mice.

58

59 **F)** Representative flow plots showing KLRG1 vs PD-1 expression among TB10.4<sub>70-84</sub>-tetramer  
60 binding CD4 T cells in the spleen of BCG-immunized CB6F1 mice.

61

62 **Supplementary Figure 4.** Figure showing gating strategy used in Figures 4 & 5.

63

64 **Supplementary Figure 5.** *Gating strategy in adoptive transfer studies.* **A)** Plot showing  
65 composition of ESAT-6 Tet+ CD4 T cells after mixing donor cells from H56 and Mtb memory mice  
66 prior to adoptive transfer into Mtb infected recipients. ESAT-6 specific donor cells were transferred  
67 in a 1.7:1 ratio of H56 relative to Mtb memory cells. **B)** Gating strategy used for analysis of lung  
68 parenchymal homing of co-adoptively transferred donor cells into infected recipients.

69

70 **Supplementary Figure 6.** *Repeat experiment – Mtb memory provides early, but transient,*  
71 *protection to Mycobacterium tuberculosis infection in contrast to H56 memory.*

72 C57BL/6 mice were rested for ~half a year prior to aerosol Mtb challenge (~100 CFU/lung). Total  
73 lung CFU was determined by serial plating at week 4, 9 and 16 in saline controls (black square),  
74 H56 memory (white circle) and Mtb memory (black circle). Data show mean  $\pm$  s.d. of 8 mice/group  
75 at week 4 & 9 and 8-12 mice/group at week 16. Two way ANOVA with Dunnett's multiple  
76 comparison test against Saline group. \* P < 0.05; \*\* P < 0.01, \*\*\* P < 0.001. ns non-significant.

77

78 **Supplementary Table 1:** Table showing the relapse rate after a 12 week Isoniacid/Rifabutin  
79 (INH/RIF) treatment started 6 weeks into an Mtb infection. Last column show the number of culture  
80 positive lungs (detection limit <10 CFU/lungs) out of lungs examined during treatment and after  
81 end of treatment (EoT) – including an almost 1½ year follow up rest period after EoT. Culture  
82 positive mice started emerging 11 weeks after end of treatment, with a relapse rate of 12.5%. NB –  
83 none of the mice included in the phenotypic characterization (Figure 1 & Supplementary figure 1)  
84 were found culture positive as assured by control plating lung homogenates of left lung lobes from  
85 all mice included.

86

87

a)

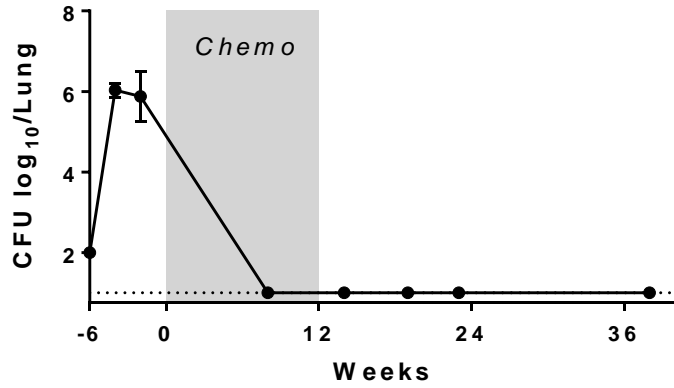

b)

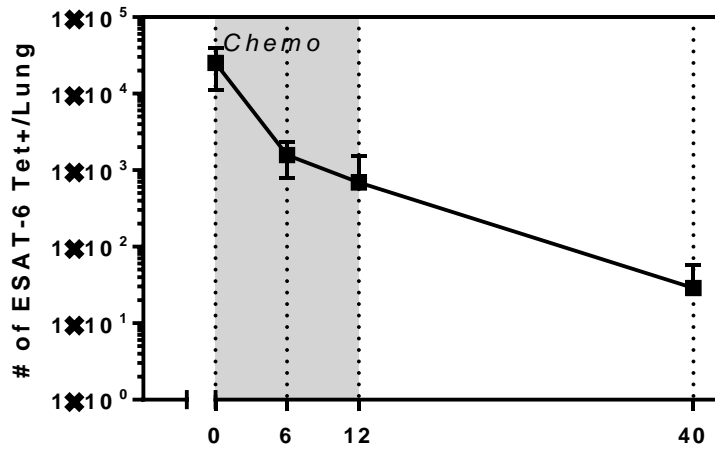

c)

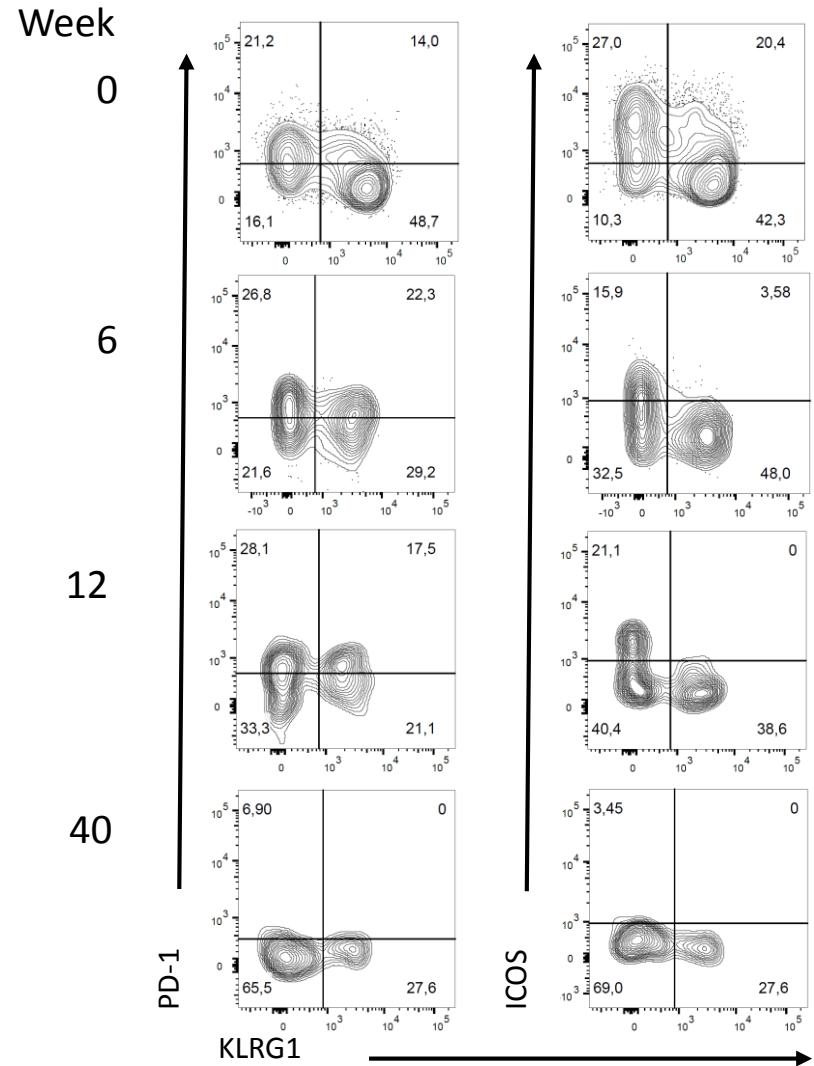

a)

ESAT-6<sub>4-17</sub>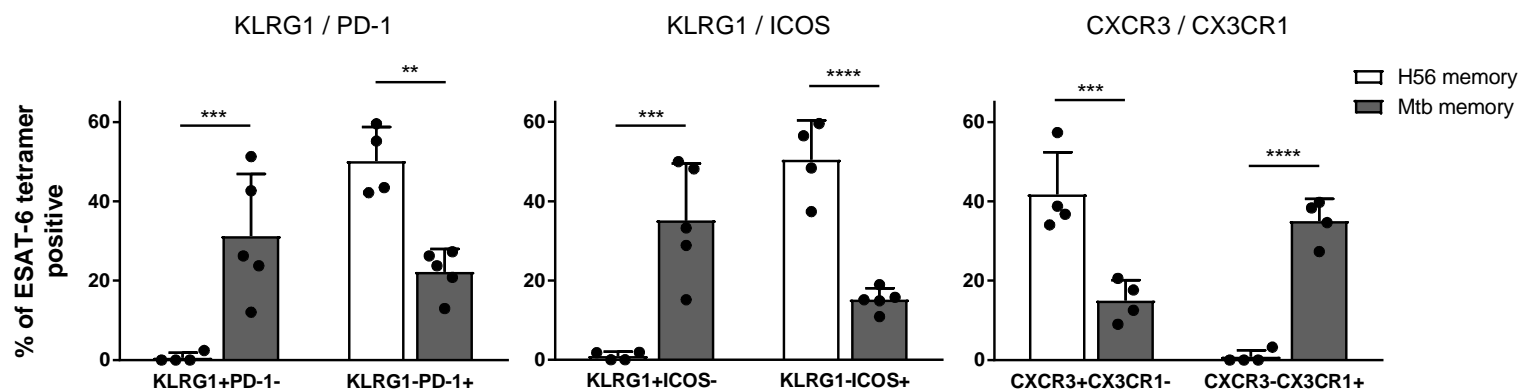

Mtb (6 wks inf > 6 wks chemo)

BCG (8 wks post-imm)

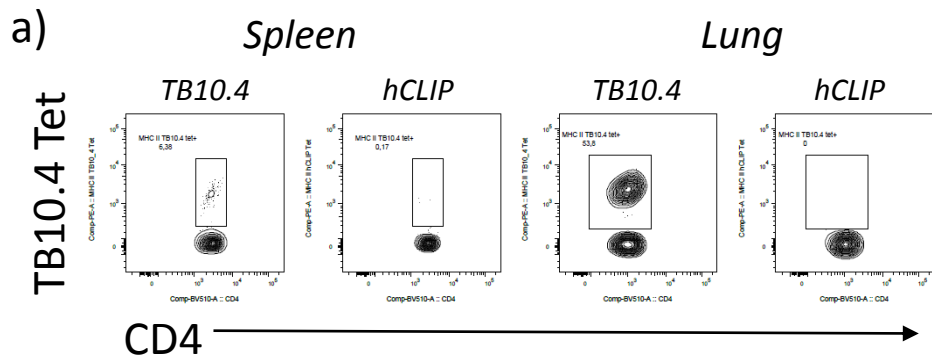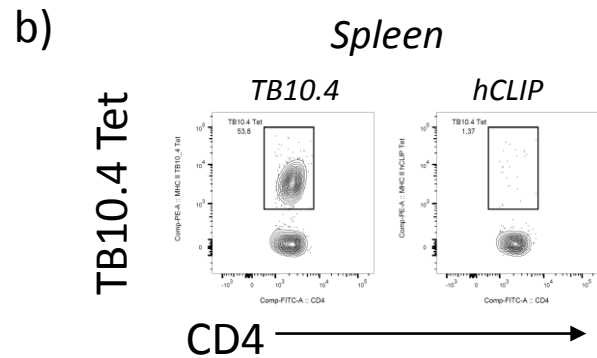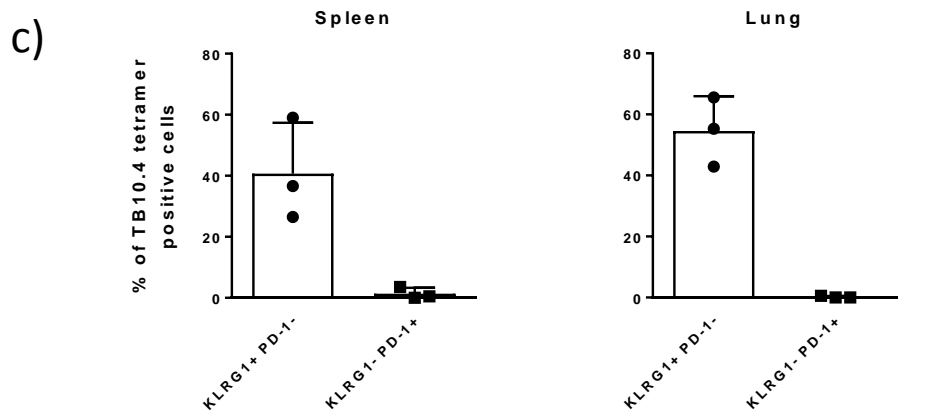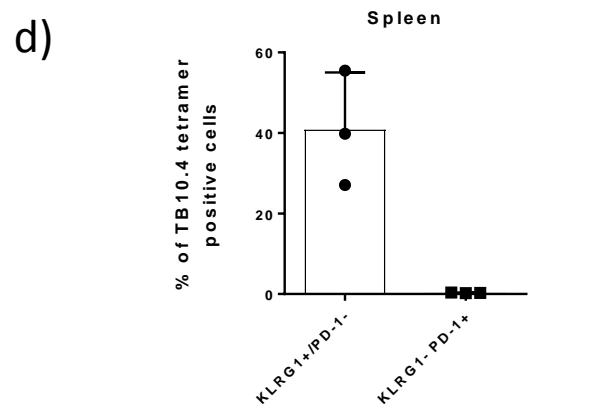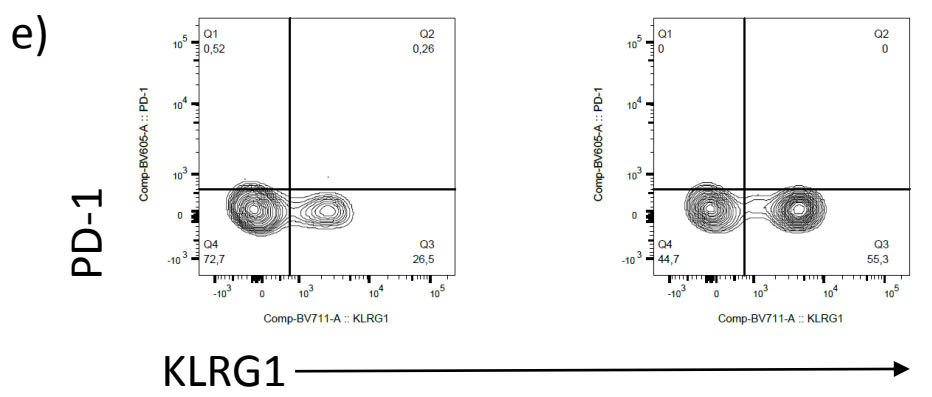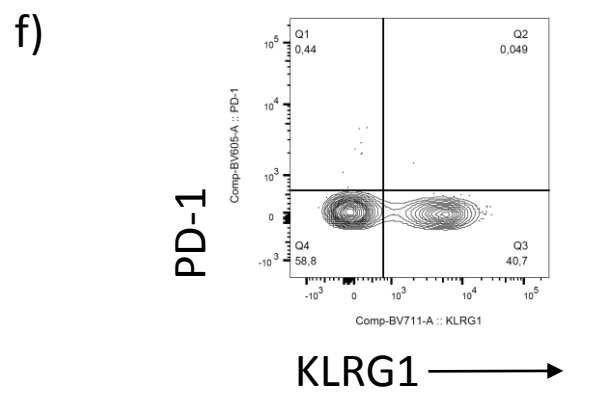

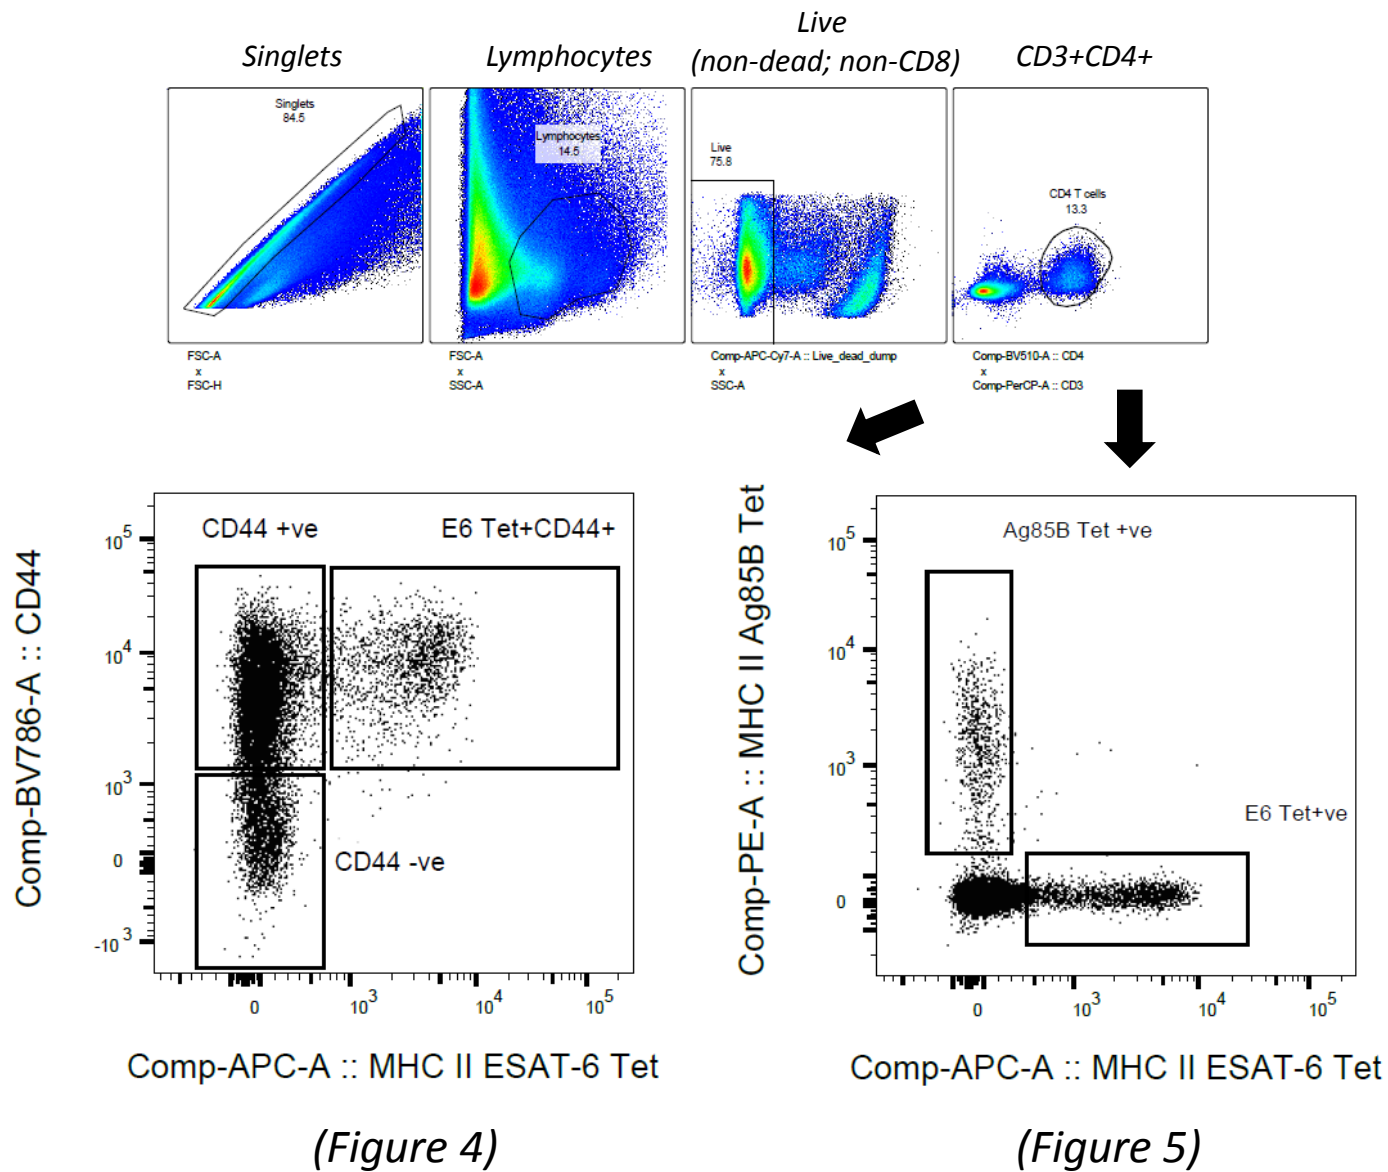



Recipient mice – Gating strategy  
E6 vs hCLIP Tet+ (Pulldown)

a)

Donor cells  
Live E6 Tet+ (Pulldown)  
(Singlets > Lymphocytes > Live CD4s > E6 Tet+)

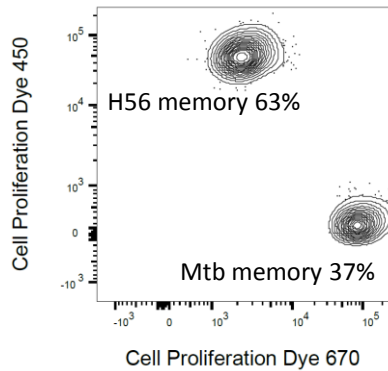

b)

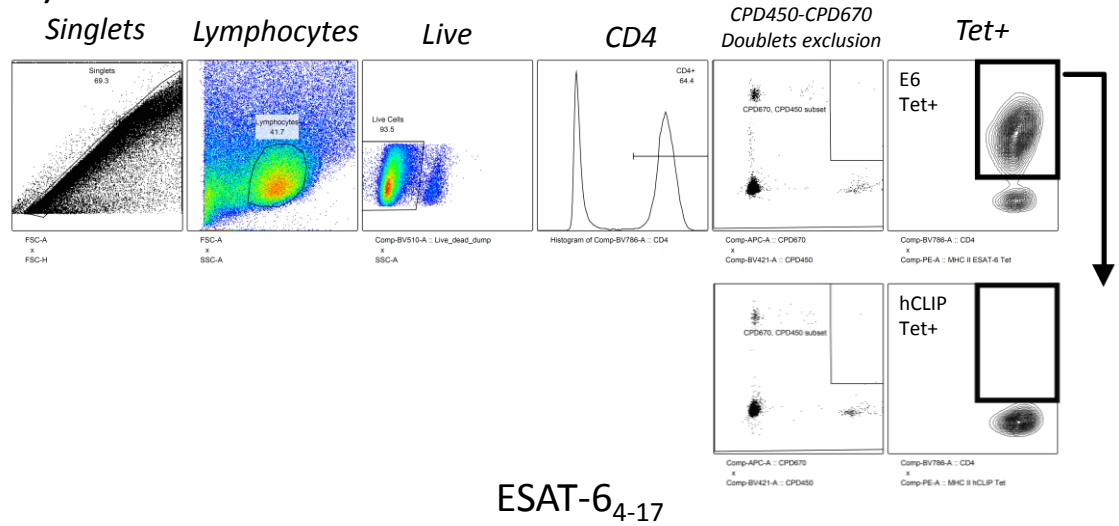

ESAT-6<sub>4-17</sub>

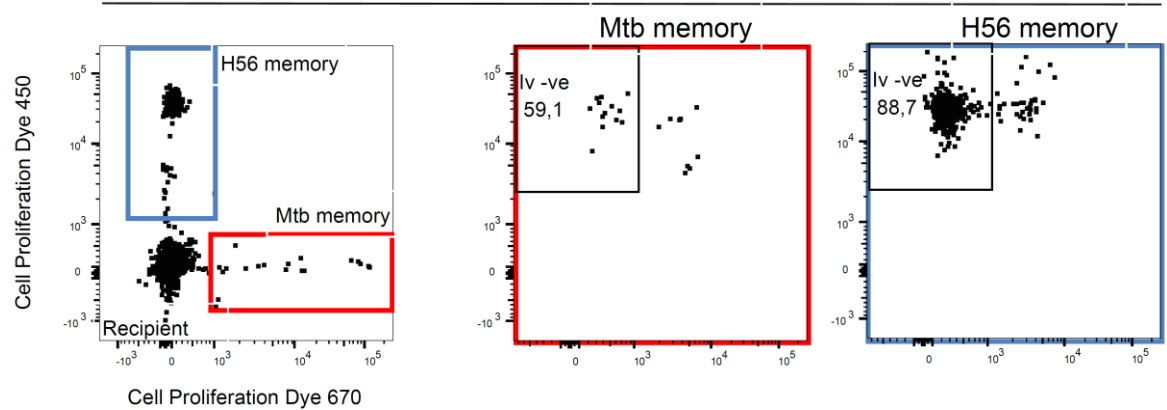

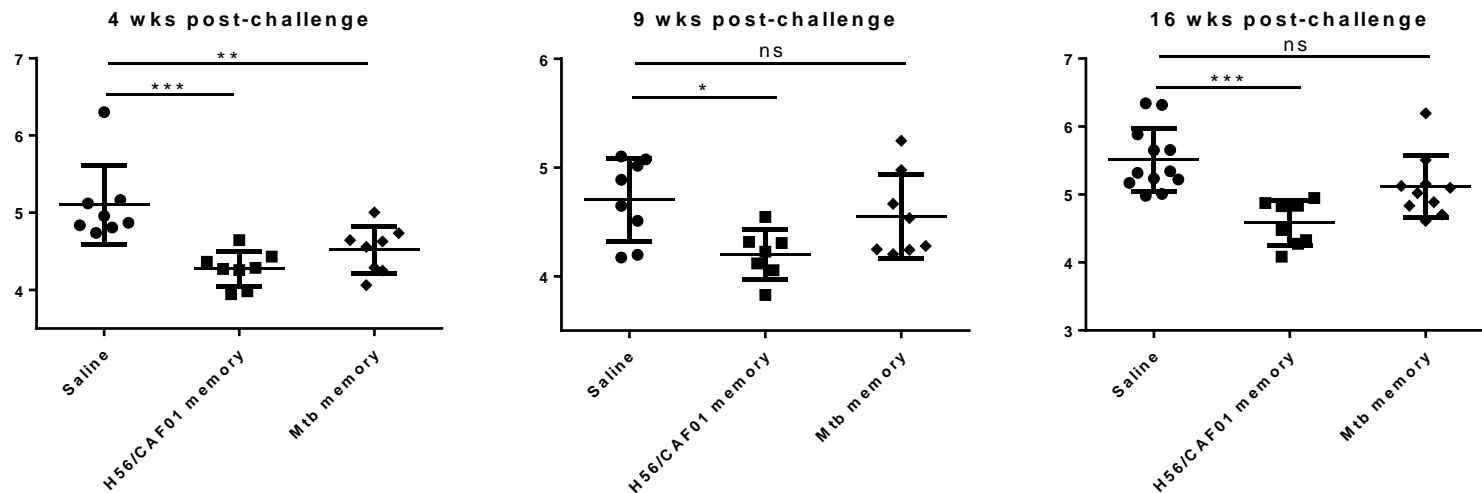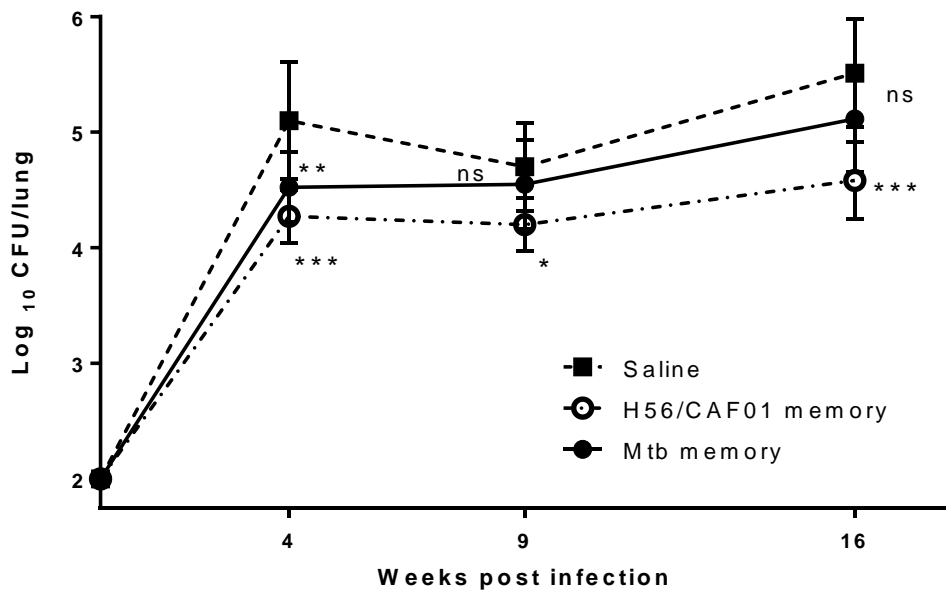

**Table****Relapse rate after EoT**

(12 weeks INH/RIF treatment started 6 weeks into Mtb infection)

| <b>Weeks after start<br/>of 12 weeks INH/RIF<br/>treatment</b> | <b>Weeks after EoT<br/>(End of Treatment –<br/>12 weeks)</b> | <b># of Culture<br/>positive</b> |
|----------------------------------------------------------------|--------------------------------------------------------------|----------------------------------|
| 6                                                              |                                                              | 0/8                              |
| 8                                                              |                                                              | 0/14                             |
| 12                                                             | 0                                                            | 0/4                              |
| 14                                                             | 2                                                            | 0/4                              |
| 19                                                             | 7                                                            | 0/16                             |
| 23                                                             | 11                                                           | 2/16                             |
| 41                                                             | 29                                                           | 2/8                              |
| 84                                                             | 72                                                           | 3/18                             |
